RESEARCH ARTICLE

# Perceived Barriers to and Facilitators of Physical Activity in Recipients of Solid Organ Transplantation, a Qualitative Study

Edwin J. van Adrichem<sup>1,2,3\*</sup>, Saskia C. van de Zande<sup>1</sup>, Rienk Dekker<sup>2,4</sup>, Erik A. M. Verschuuren<sup>3,5</sup>, Pieter U. Dijkstra<sup>2,6</sup>, Cees P. van der Schans<sup>1,2</sup>

**1** Hanze University of Applied Sciences, Research Group Healthy Ageing, Allied Health Care and Nursing, Groningen, the Netherlands, **2** University of Groningen, University Medical Center Groningen, Department of Rehabilitation Medicine, Groningen, the Netherlands, **3** University of Groningen, University Medical Center Groningen, Groningen Transplant Center, Groningen, the Netherlands, **4** University of Groningen, University Medical Center Groningen, Center of Sports Medicine, Groningen, the Netherlands, **5** University of Groningen, University Medical Center Groningen, Department of Pulmonary Diseases and Tuberculosis, Groningen, the Netherlands, **6** University of Groningen, University Medical Center Groningen, Department of Oral and Maxillofacial Surgery, Groningen, the Netherlands

\* [e.j.van.adrichem@pl.hanze.nl](mailto:e.j.van.adrichem@pl.hanze.nl)

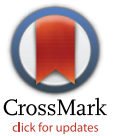

OPEN ACCESS

**Citation:** van Adrichem EJ, van de Zande SC, Dekker R, Verschuuren EAM, Dijkstra PU, van der Schans CP (2016) Perceived Barriers to and Facilitators of Physical Activity in Recipients of Solid Organ Transplantation, a Qualitative Study. PLoS ONE 11(9): e0162725. doi:10.1371/journal.pone.0162725

**Editor:** Stanislaw Stepkowski, University of Toledo, UNITED STATES

**Received:** February 19, 2016

**Accepted:** August 26, 2016

**Published:** September 13, 2016

**Copyright:** © 2016 van Adrichem et al. This is an open access article distributed under the terms of the [Creative Commons Attribution License](https://creativecommons.org/licenses/by/4.0/), which permits unrestricted use, distribution, and reproduction in any medium, provided the original author and source are credited.

**Data Availability Statement:** Due to ethical restrictions related to protecting patient confidentiality, all relevant and anonymized data are available upon request from the corresponding author and after ethical approval of the University Medical Center Groningen, Groningen, the Netherlands.

**Funding:** The authors received no specific funding for this work.

**Competing Interests:** The authors have declared that no competing interests exist.

## Abstract

### Background

Sufficient physical activity is important for solid organ transplant recipients (heart, lung, liver, kidney). However, recipients do not meet the recommended amount or required type of physical activity. The perceived barriers to and facilitators of physical activity in this population are largely unknown.

### Methods

Semi-structured in depth interviews were conducted with solid organ transplant recipients in order to explore experienced barriers and facilitators. Qualitative methodology with thematic line-by-line analysis was used for analysis, and derived themes were classified into personal and environmental factors.

### Results

The most important indicated barriers were physical limitations, insufficient energy level, fear, and comorbidities. The most frequently mentioned facilitators included motivation, coping, consequences of (in)activity, routine/habit, goals/goal priority, and responsibility for the transplanted organ. Neutral factors acting as a barrier or facilitator were self-efficacy and expertise of personnel. A comparison of barriers and facilitators between transplant recipient groups yielded no overt differences.

## Conclusion

Several personal and environmental factors were indicated that should be considered in intervention development to increase physical activity behavior in solid organ transplant recipients.

## Introduction

In 2014 a total of 7,741 solid organ transplants (SOT) were performed in the EuroTransplant region, resulting in 46.8 transplants per million persons in the entire region and 46.6 per million persons in the Netherlands [1]. Short-term survival after SOT has been greatly improved in the past decades due to advances in organ preservation, surgical techniques, and immunosuppressant medication [2]. As a result, long-term survival and the associated issues like new onset diabetes, medication adherence, and quality of life have gained increased attention, as has the level of physical activity (PA) after SOT.

While clinical experience and a few small studies indicate that SOT recipients can achieve average to above average levels of PA [3–5], the majority of recipients do not meet the recommended amount and type of PA [6–14]. Movement behavior is below the levels of the average population, which results in a generally sedentary and inactive lifestyle. This occurs despite the fact that a higher level of PA has been shown to be associated with decreased cardiovascular and all-cause mortality in renal transplant recipients and improved outcomes like a shorter hospital stay and increased short-term survival in lung and liver transplant recipients [2]. Furthermore, exercise training has been shown to improve physical functioning and quality of life in SOT recipients [15,16] and has the potential to reduce cardiovascular risk factors [15].

It is not fully clear why solid organ transplant recipients do not regain a normal level of physical activity, but several physical factors are likely to contribute to the low PA levels in this population. Firstly, peripheral muscle dysfunction exists pre-transplantation in all organ recipient groups [2,17]. This condition is aggravated post-transplantation by many factors including the use of immunosuppressive medication [17–19]. Secondly, a reduction in  $VO_2$  peak ranging from 20–50% is observed despite near normal functioning of the transplanted organ [17].

In general, several personal and environmental factors may also influence PA behavior. However, perceived barriers to and facilitators of PA in SOT recipients are primarily unexplored. Barriers refer to perceived obstacles that hinder the performance of PA, and facilitators refer to factors increasing the likelihood of performing PA [20]. Several barriers to and facilitators of PA are indicated in end-stage kidney, liver, lung, and heart disease. Salient barriers in the end-stage disease populations being indicated are ‘fluctuating health status’, ‘concerns about aggravation’, ‘fatigue’, ‘shortness of breath’, ‘fear of falling’, ‘lack of support’, and ‘lack of motivation’ [21–28]. Important facilitators being indicated in the end-stage disease phase are ‘exercising for health’, ‘social support’, ‘professional support’, ‘enjoying the activity’, ‘control of the condition’, and ‘social interactions’. While several barriers to and facilitators of PA in the transplant population have been proposed, only one study has examined them in a single group of SOT recipients by means of a questionnaire [29]. Examples of important barriers ascertained in kidney transplant recipients are ‘lack of motivation’ and ‘preferring to spend time otherwise’, whereas important facilitators were ‘feeling healthy’ and ‘wanting to feel better’. However, the use of the questionnaire did not provide insight into the recipients’ experiences of these barriers and facilitators and was limited to only kidney transplant recipients. The most appropriate research technique indicated in order to get insight into the individual’s

decision making process and to get detailed information on perceptions, beliefs and attitudes is the use of individual semi-structured interviews [30]. The aim of the current qualitative study was to explore the perceived barriers to and facilitators of PA in the four major SOT recipient groups.

## Materials and Methods

### Participant selection

Semi-structured interviews were performed with patients who had received a solid organ transplantation at the University Medical Center Groningen (UMCG). Participants were eligible if they had a stable organ function, and if they comprehended the Dutch language. A purposive sampling strategy was employed in which participants were selected who would adequately represent diversity and produce relevant information to the research question (i.e., active vs. inactive). Judgment of suitability was made by the treating physician or physician's assistant on the basis of their impression and anamneses of their latest contact with the patient in the outpatient setting; the exact level of physical activity was not assessed. Suitable participants were approached by their treating physician or physician's assistant and were invited to return an enrollment sheet by mail after reading the invitation letter. Interviews occurred in blocks of four participants in order to maintain an equal distribution of four organ groups (heart, lung, liver, and kidney). Interviews were conducted until data saturation occurred (additional interviews to the point at which no new themes arose during subsequent data collection). All participants provided their written informed consent prior to the interview. Data were coded and anonymized. The study complied with the declarations of Helsinki and Istanbul. None of the transplant donors were from a vulnerable population and all donors or next of kin provided written informed consent that was freely given. The Institutional Review Board of the UMCG provided approval to conduct the study (METc 2013/410).

### Data collection

Individual in-depth interviews were performed by one investigator (EA), a human movement scientist/ physical therapist (aged 30, male) with four and a half years of experience with transplant recipients in the inpatient and outpatient setting. Interviews took place between December 2013 and January 2014 and were carried out at the participant's home or during an outpatient visit at the convenience of the participant. The interviewer had no treatment relationship with any of the interviewed participants. The areas addressed in the interviews were outlined in an interview guide with open-ended questions covering themes and items derived from the literature, a pilot study, and key questions from physical therapists, clinicians, and researchers (S1 Appendix). Thereby, PA was defined as any bodily movement produced by skeletal muscles that resulted in energy expenditure [31] and as a guideline for participants this was formulated as activities that made the breathing frequency go up and resulted in getting warmer or sweating. The interview guide was tested and evaluated in a pilot setting with two organ transplant recipients not participating in the actual study, after which final alterations were made. The content of the interview guide could be revised during the process, and additional questions could be added in order to address newly emerged topics derived from the ongoing data analysis. The interviews were recorded and transcribed verbatim.

### Data analyses

The data were analyzed using line-by-line thematic analysis [32,33]. First, two individual reviewers (EA and SZ) familiarized themselves with the raw data after which initial codes were

generated of interesting features of the data. The data from the first four interviews were reviewed and coded independently by the two reviewers, and inconsistencies were reviewed and discussed with a third reviewer (PD). A codebook was subsequently created which the two reviewers used to independently code the remaining interviews. The codebook was used as a guide, however, new codes could be given as well. After completing the coding of interviews, the reviewers compared results, and consensus was reached. The codes used were subsequently collated into potential themes, which were reviewed by checking them against the coded extracts and the original data. Initially, all themes were placed in a scheme to add insight into themes being absolute barriers, absolute facilitators, or being positioned in between this continuum, and to clarify which themes were stronger or weaker. A five category scale was chosen indicating (1) absolute barriers; (2) themes being mentioned mainly as barriers but sometimes as a facilitator; (3) themes being mentioned as a barrier or facilitator equally; (4) themes being mentioned mainly as facilitator but sometimes as a barrier; and (5) absolute facilitators. The themes were subsequently ordered into *personal factors* and *environmental factors* as part of the Physical Activity for people with a Disability (PAD) Model (Fig 1) [34]. This model is based on the International Classification of Functioning (ICF), Disability and Health and the Attitude, Social Influence and Self-Efficacy (ASE) Model and was selected because of its integration of the

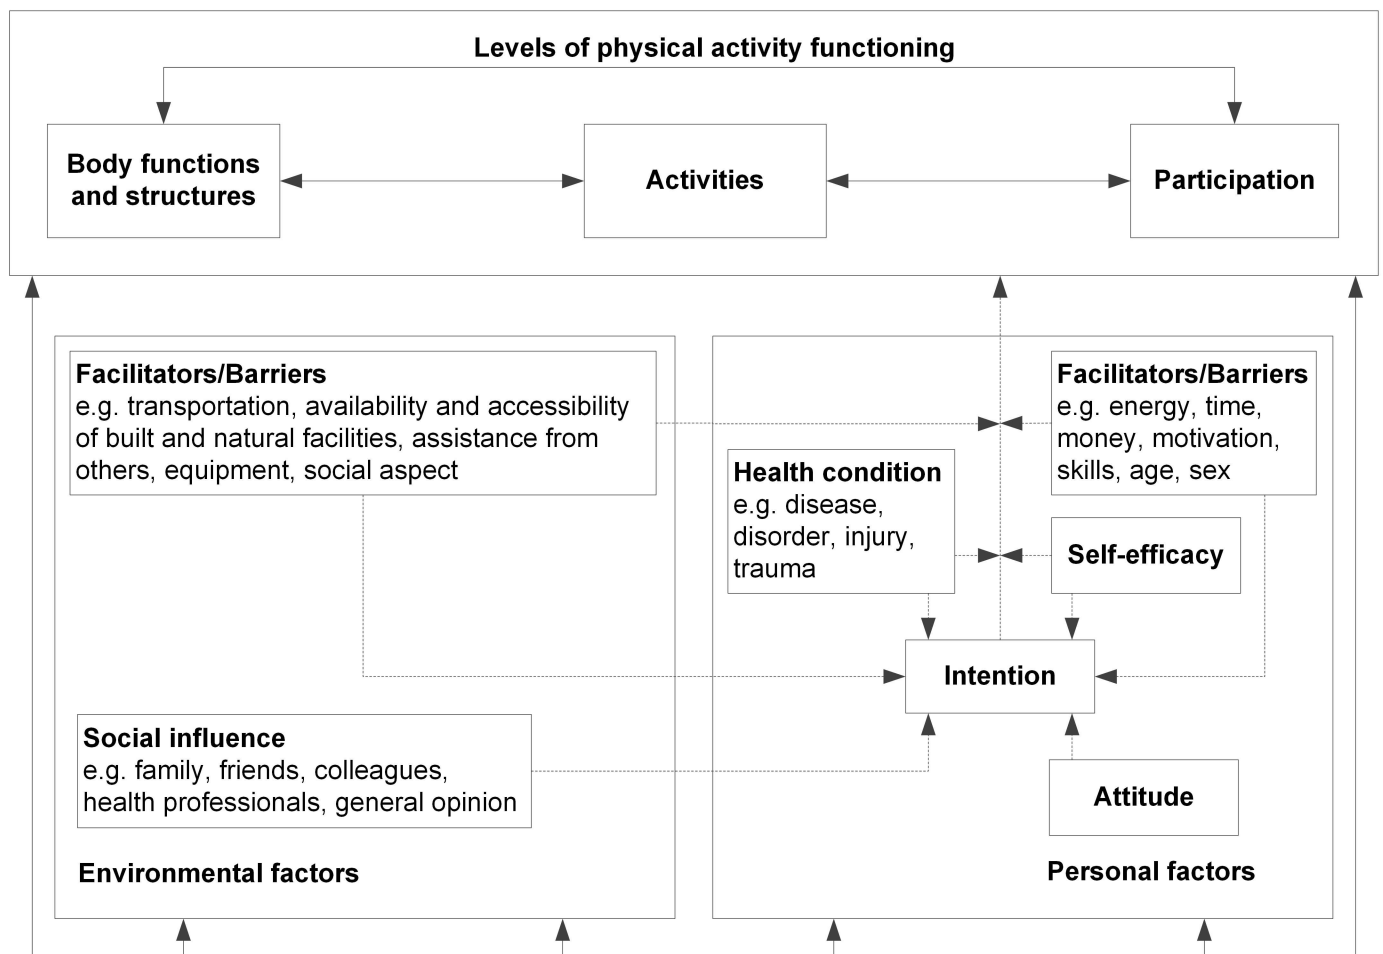

**Fig 1. Physical Activity for People with a Disability (PAD) model.** Reprinted from van der Ploeg et al., 2004 [34] under a CC BY license, with permission from Springer, original copyright 2004.

doi:10.1371/journal.pone.0162725.g001

concept of PA behavior and its relationship with functioning. Although the PAD Model was developed as a theoretical framework on PA of people with a disability, both underlying models (ICF and ASE model) were developed for the general population and are not disease specific. The content of the PAD model was judged as generic enough to be suitable for the population under study. After classification in the model, definitions and names for each theme were clarified, and quotes (given in italic font) were selected that illustrated the derived themes [32]. Peer debriefing (review by field expert) secured quality assessment. In the process, the qualitative data analysis program 'ATLAS.ti' was used to manage, organize, store, and annotate the data (ATLAS.ti, v 6.2.23, Scientific Software Development GmbH, Berlin, Germany).

## Results

During the study period, 16 potential participants were approached, and all were willing to participate. There were four recipients from each organ transplantation group. Participant characteristics are presented in Table 1.

**Table 1. Participant characteristics.**

|    | Transplanted organ | Disease before transplantation | Time since Tx (months) | Gender (M/F) | Age (years) | Immunosuppressive medication                   | Comorbidities                                             |
|----|--------------------|--------------------------------|------------------------|--------------|-------------|------------------------------------------------|-----------------------------------------------------------|
| 1  | Heart              | DCM                            | 93                     | M            | 51          | Tacrolimus, mycophenolate mofetil              | DM II                                                     |
| 2  | Heart              | DCM                            | 63                     | M            | 41          | Prednison, ciclosporine                        | -                                                         |
| 3  | Heart              | HCM                            | 43                     | F            | 56          | Prednison,tacrolimus, mycophenolate mofetil    | Hyperthyroidism                                           |
| 4  | Heart              | Cong. AV-block                 | 23                     | F            | 21          | Tacrolimus, mycophenolate mofetil              | -                                                         |
| 5  | Lung               | COPD                           | 6                      | F            | 57          | Prednison,tacrolimus, mycophenolate mofetil    | HT                                                        |
| 6  | Lung               | PH                             | 8                      | F            | 50          | Prednison, tacrolimus                          | Reduced renal function                                    |
| 7  | Lung               | PH                             | 12                     | M            | 53          | Prednison,tacrolimus, mycophenolate mofetil    | Hepatitis C, hypercholesterolemia, reduced renal function |
| 8  | Lung               | COPD                           | 11                     | M            | 39          | Prednison,tacrolimus, mycophenolate mofetil    | Hypercholesterolemia, reduced renal function              |
| 9  | Liver              | Autoimmune hepatitis           | 18                     | M            | 70          | Prednison,tacrolimus, mycophenolate mofetil    | DM II                                                     |
| 10 | Liver              | PSC                            | 19                     | M            | 43          | Tacrolimus, mycophenolate mofetil              | -                                                         |
| 11 | Liver              | PBC                            | 144                    | F            | 63          | Prednison                                      | Reduced renal function                                    |
| 12 | Liver              | Autoimmune hepatitis           | 123                    | M            | 22          | Prednison,tacrolimus, mycophenolate mofetil    | Osteoporosis                                              |
| 13 | Kidney             | IgA nephropathy                | 15                     | M            | 45          | Prednison, mycophenolate mofetil               | HT, hypercholesterolemia                                  |
| 14 | Kidney             | Amyloidosis                    | 6                      | M            | 54          | Prednison,tacrolimus, mycophenolate mofetil    | Amyloidosis, hyperthyroidism                              |
| 15 | Kidney             | Hypertensive emergency         | 7                      | F            | 42          | Prednison,tacrolimus, mycophenolate mofetil    | -                                                         |
| 16 | Kidney             | Renal cysts                    | 11                     | F            | 52          | Prednison, mycophenolate mofetil, ciclosporine | Sjögren                                                   |
|    | Median             |                                | 16.5                   | 9M/ 7F       | 50.5        |                                                |                                                           |
|    | IQR                |                                | 8.8; 58.0              |              | 41.3; 55.5  |                                                |                                                           |

PBC, primary biliary cholangitis; DCM, dilating cardiomyopathy; COPD, chronic obstructive pulmonary disease; PH, pulmonary hypertension; PSC, primary sclerosing cholangitis; HCM, hypertrophic cardiomyopathy; DM II, diabetes mellitus type II; HT, hypertension; IQR, interquartile range.

doi:10.1371/journal.pone.0162725.t001

**Table 2. Overview distribution barriers to and facilitators of physical activity and solidity in the data.**

|          | Barriers                          | ←                              |                                | →                           | Facilitators                         |
|----------|-----------------------------------|--------------------------------|--------------------------------|-----------------------------|--------------------------------------|
|          | 1.                                | 2.                             | 3.                             | 4.                          | 5.                                   |
| Stronger | Physical limitations (15/75)      | Energy level (12/45)           |                                | Coping (15/55)              | Motivation (16/148)                  |
| ↑        | Fear (9/20)                       |                                | Self-efficacy (13/35)          | Routine/habit (14/40)       | Consequences of (in)activity (14/40) |
|          | Comorbidity (8/26)                |                                | Expertise of personnel (13/26) | Goals/goal priority (13/88) |                                      |
|          | Bad weather (6/8)                 |                                |                                | Transplanted organ (10/29)  |                                      |
| ↓        | Post-transplant life-events (4/6) | Side-effects medication (6/12) |                                | Social support (9/14)       |                                      |
|          | Age (3/4)                         | Social role (5/19)             |                                | Strength (8/15)             |                                      |
| Weaker   | Financial resources (3/4)         |                                | Group activity (4/8)           | Weight (5/13)               |                                      |
|          |                                   |                                |                                |                             |                                      |

Codes are classified on the continuum from barrier to facilitator (1. [red] absolute barriers; 2. [orange] themes being mentioned mainly as barriers but sometimes as a facilitator; 3. [yellow] themes being mentioned as a barrier or facilitator equally; 4. [light green] themes being mentioned mainly as facilitator but sometimes as a barrier; and 5 [green] absolute facilitators) and on the continuum of being a stronger or a weaker factor. The numbers in parenthesis indicate the number of interviews the code is represented in and the groundedness of the code (number of quotations linked to that particular code).

doi:10.1371/journal.pone.0162725.t002

Several barriers and facilitators to being physically active were identified from the interviews and coded accordingly (Table 2). No overt differences were determined in the distribution of the mentioned barriers and facilitators between the different SOT recipient groups (S1 Table).

All of the identified barrier and facilitators were classified in the PAD Model. Personal factors were divided into *physical*, *psychological*, and *other* factors, and environmental factors were divided into *social environment*, *physical environment*, and *other* (Table 3).

### Personal barriers and facilitators to PA

**Physical.** The most salient physical barrier mentioned was having physical limitations. Physical limitations refer to inadequate physical capacity to perform PA such as insufficient exercise capacity or muscle strength and body signals like pain or cramps. These physical limitations were most often described in relation to the transplantation but were indicated as unrelated to the transplantation by some.

*‘So, it’s mainly due to the loss of coordination, that’s the hardest part. When kicking a ball and standing on one leg, stuff like that, then you experience a barrier.’*

(LungTx, male, 53 years)

The aspect strength was indicated in half of the interviews and was described in relation to experienced physical limitations. Inadequate strength to perform activities was experienced as a motivator to perform strength training by some but was experienced as a barrier to be physically active by others.

*‘I really had a lot of need for strength training. I noticed that my entire body had actually failed. I needed to do some muscle building’*

(HeartTx, male, 51)

**Table 3. Overview of personal and environmental barriers and facilitators to physical activity in recipients of solid organ transplantation.**

| <b>Personal</b>             | <i>Barriers</i>             | <i>Facilitators</i>                    |
|-----------------------------|-----------------------------|----------------------------------------|
| <i>Physical</i>             | Physical limitations        |                                        |
|                             | Lack of energy              | Increased energy level                 |
|                             | Comorbidity                 |                                        |
|                             | Lack of strength            | Maintaining/increasing muscle strength |
|                             | Weight being a barrier      | Wanting to lose weight/maintain weight |
|                             | Age                         |                                        |
| <i>Psychological</i>        | Lack of motivation          | Motivation                             |
|                             | Lack of time                | Reinforcement                          |
|                             | Other priorities            | Fun/pleasure                           |
|                             | Fear (complications/injury) | Competition                            |
|                             | Coping                      | Coping                                 |
|                             | Goals/goal priority         | Goals/goal priority                    |
| <i>Other</i>                | Post-transplant life-events | Self-efficacy                          |
|                             | Routine/habit               | Routine/habit                          |
|                             |                             | Consequences of (in)activity           |
|                             |                             | Transplanted organ                     |
| <b>Environmental</b>        | <i>Barriers</i>             | <i>Facilitators</i>                    |
| <i>Social environment</i>   | Lack of expertise personnel | Expertise personnel                    |
|                             | Lack of social support      | Social support                         |
|                             | Lack of group activity      | Family/friends                         |
|                             | Social role                 | Professionals                          |
| <i>Physical environment</i> |                             | Group activity                         |
|                             | Bad weather                 | Having a dog (motivation)              |
| <i>Other</i>                | Side-effect medication      | -                                      |
|                             | Financial resources         |                                        |

doi:10.1371/journal.pone.0162725.t003

Comorbidities were also mentioned in relation to experienced physical limitations. As comorbidities limited the physical capacity or interfered with PA behavior in another way they were only mentioned as barriers.

*‘So, I had some problems with my heart, chronic atrial fibrillation. And once in a while it really seriously skipped a beat and then it frightened me a little. So I was afraid of it.’*

(LungTx, male, 53 years)

The majority of participants mentioned their energy level. Energy level was primarily stated as a barrier to PA but was described as a facilitator as well. A lack of energy to perform PA was usually mentioned in combination with goal priority. Other social activities or obligations were preferred instead of PA. Some participants perceived that being physically active could also lead to a feeling of increased energy and thereby be facilitating.

*‘I’m kind of in a dilemma, because when I use my energy for school I cannot use it for sports.’*

(LiverTx, male, 22 years)

Finally, participants mentioned weight as a personal physical barrier or facilitator. Being overweight was a barrier to some due to a perceived increased threshold for initiating being active. Others indicated that maintaining or reducing weight was a facilitator for being active, which was often related to the suspected relationship between medication use and weight gain.

*‘Look, I have gained weight enormously and it is not like it is limiting me in my daily life, not really, but I do have a higher threshold towards sports engagement.’*

(HeartTx, male, 51 years)

**Psychological.** The most mentioned psychological barrier and facilitator to PA was motivation. Aspects of motivation that were mentioned could be divided into *reinforcement* (the perception of health benefits related to physical activity), *fun/pleasure*, and *competition*. Perceiving health benefits was mentioned as a facilitator and reinforced participants to maintain or increase PA levels. Perceiving fewer health benefits was indicated as resulting in a lack of reinforcement.

*‘The satisfaction. . . you are building something, that’s it. The first weeks you are exhausted and not able to do that much. But then you are just. . ., you do a warming-up and then you do some strength training and cool down on the rowing machine. And that with another heart, you know, that is so strange.’*

(HeartTx, male, 41 years)

Having fun and experiencing pleasure while being physically active and finding pleasure in competition are mentioned as facilitators of PA.

*‘Well, I did sports before; it really is one of my passions. I just think it’s very important. I wasn’t able to do it for four years and now that I can I want to make full use of it.’*

(HeartTx, female, 21 years)

A lack of motivation is mentioned as a barrier to PA. Aspects related to a lack of motivation that were indicated were a lack of time and having other priorities. These later aspects were mentioned in relationship to goal priority and energy level as well.

*‘Yes, I used to do it [training] but on a given time it became gradually less frequent until I stopped. I think I should train but I have to overcome so much resistance, so, is that worth it?’*

(LiverTx, female, 63 years)

Goals or goal priority were indicated as a barrier as well as a facilitator. Participants described that when prioritizing other aspects of life over PA, they function as a barrier. As previously stated, this was also mentioned in combination with insufficient energy and/or a lack of motivation. It was indicated that having goals for which a certain exercise capacity is required can facilitate PA behavior.

*‘I have to get to the point on which I say, “now I have to change course”. But now is not the time. . .’*

(HeartTx, male, 51 years)

*‘The moment you start noticing you can handle physical things again, then you start planning. And then you start the list. . ., well, it’s not like I had a bucket list of things I wanted to do before I died. But, for me, at that time, the list started of all the things I would have done when I wouldn’t have been ill. And I needed to train for these goals.’*

(HeartTx, female, 56 years)

Other psychological barriers to or facilitators of PA that were mentioned are coping with post-transplantation life events and self-efficacy. Participants’ coping style was indicated as



being facilitating or function as a barrier. The latter is the case with post-transplant life events. A high level of self-efficacy can provide participants with a certain control over life through which they are able to cope with situations.

*I honestly have to say. . . it suits me, as a person. To do sports is an outlet. I clear my mind. Somebody else might cry about it but I go out and do sports instead.*

(LiverTx, male, 43 years)

*[After I was transplanted] I lost a good friend who had the same disease as I had, she died on my birthday. . . That gave me the biggest setback, then it started to take its course. I actually couldn't recover from that.*

(HeartTx, male, 51 years)

The final psychological aspect mentioned as a barrier is *fear*. This aspect is presented in combination with the aspect *transplanted organ* in the subsequent section.

**Other.** Personal aspects categorized in the division *other* were routine/habit, consequences of (in)activity and the transplanted organ. PA being a routine or a habit of a participant was mentioned as a facilitator to participation in PA. A routine without PA was indicated as being so habitual in a participant that changing it is very difficult.

*Well, I don't really like fitness, I would rather go biking outside or go for a walk. But I do it anyway because, on the one hand I can be compulsively, and it keeps me on track.*

(HeartTx, female, 56 years)

*I haven't done anything for fifteen, twenty years. So yes, that. . . So, everything has to. . . , for everything you have to. . . not feel like it, but do it. But, because you didn't do it for such a long time. . .*

(LungTx, male, 53 years)

Knowledge regarding the physical or medical consequences of being inactive and knowing the benefits of being active were both perceived by participants as facilitators of PA behavior (*consequences of (in)activity*).

*I'm the type of person, when somebody says it is good for you to be physically active because you would possibly have an increased risk of heart disease, diabetes or other things due to the medication that you use then I have that in the back of my mind. Then I think, yes, I can sit here comfortably but I better get moving.*

(KidneyTx, male, 54 years)

An indicated facilitating aspect specific for the population under study was the transplanted organ. Having received a transplantation and wanting to take good care of the new organ was described as a facilitator to PA. The sheer fact of having the ability to be physically active was mentioned as facilitator as well.

*Especiallly with biking and so on. Because you have another kidney, I want to live longer, healthier, all off that plays along.*

(KidneyTx, female, 42 years)

*For me it is very, but really very connected to each other. You know, like my life after the transplantation is a life in which I can be active, so I am.*

(HeartTx, female, 56 years)

Receiving a transplantation is not mentioned as a barrier, per se, but a number of factors classified under the psychological personal barrier *fear* are related to the transplanted organ. Fear of damaging the new organ and insecurity with the body and body signals were indicated as a barrier.

*'Yes, look, when I would go cycling into the forest, what I would like to do, but then you are alone. . . And you think, what if something happens, well. . . it might take a day before they find me. So I do not, . . . no I do not dare to.'*

(KidneyTx, male, 45 years)

## Environmental barriers and facilitators to PA

**Social environment.** The most salient aspect of the social environment mentioned as a barrier as well as a facilitator is the expertise of personnel. Inadequate expertise was identified as a factor that could incite a negative feeling about being physically active and even influence people to discontinue training. Sufficient expertise, on the other hand, was indicated as a great stimulant. Learning how to train and becoming educated regarding their new boundaries in a controlled setting was described as a stimulant to be physically active.

*'There was a program set up [by the local physiotherapist] and the only thing I remember is that it made me completely worn out. One day, another therapist took over and asked what part of the program I did today and what part at the other session of the week. I said I had to do the entire program, but he said that it was way too much. So it was split in two and since then I started to make progress.'*

(LiverTx, female, 63 years)

*'The physical therapist provided excellent help. It was especially helpful in improving your self-confidence. And that was very useful afterwards with fitness training and all.'*

(HeartTx, female, 56 years)

Furthermore, participant perceived that PA behavior was influenced through social support and by exercising in a group. Family and friends were indicated to motivate or function as an exercise partner. Professionals also were mentioned to have a stimulating role by providing a pleasant environment in which to exercise. Exercising in a group was perceived as motivating because of the social contact as well as a certain experienced obligation to be present. These factors were all indicated also as barriers.

*'I could ride [my bicycle], sitting behind the other boys [down the wind] and they kept an eye on me. So that is a good thing, when you have friends that guide you a little.'*

(LiverTx, male, 43 years)

*'Because you are there [to exercise] for quite some time already you know everybody [all therapist], that makes it more pleasant. The social aspect, that is what I like about it too.'*

(KidneyTx, female, 52 years)

The social role of the participants could be an environmental barrier as well. Participants indicated that when they feel as if they are required to fulfill a social role, for instance as a caretaker in their family, interference with being physically active can occur.

*'I would like to increase my physical activity level but then first the situation at home should be more stable, with my two sons and my wife. A lot of things happened and my primary goal is that I want me and my family to be okay again.'*

(HeartTx, male, 51 years)

*'I have my physical limitations. . . my wife is taking care of our handicapped daughter for 19 years already. . . We always took care of her together but she does that on her own now. She needs a lot of care. . . So. . . when I would go cycling then there are so many other things [I could do]. I actually would leave my wife to it, so I rather stay at home and see what I can do.'*  
(KidneyTx, male, 54 years)

**Physical environment.** Bad weather is referred to as a barrier to PA by participants while having a dog is indicated as a motivation to being physically active. Both were classified as aspects from the physical environment. No reference was made to availability or accessibility of built and natural facilities by the participants.

**Other.** A specific aspect for the population under study is the use of immunosuppressant medication which is indicated by participants as a barrier to PA due to the side effects.

*'I wanted to do a contact sport but because of my new liver and the fact that I developed osteoporosis due to the use of medication, the risk was too high.'*  
(LiverTx, male, 22 years)

A lack of financial resources was mentioned as a barrier in a limited number of interviews (three out of sixteen).

## Discussion

This qualitative research identified the perceived barriers to and facilitators of PA in SOT recipients. The most common and important barriers were physical limitations, energy level, fear, and comorbidities. The most frequently indicated and important facilitators were motivation, coping, consequences of (in)activity, routine/habit, goals/goal priority, and the transplanted organ. Important neutral factors that acted as barriers or facilitators included self-efficacy and the expertise of personnel.

Several factors that were classified in the personal components: *physical* (physical limitations, lack of energy, co-morbidity, weight, age), *psychological* (motivation, coping, goals) and *other* (routine/habit, consequences of (in)activity) are also indicated as barriers and facilitators to PA in the general population and in older adults [35–38]. The same applies to the majority of factors classified in *social environment* (social support, group activity, social role), *physical environment* (weather) and *other* (financial resources) [35–38]. Although little studies are available, remarkable agreements in barriers to and facilitators of PA are seen with patients that underwent coronary artery bypass graft (CABG) surgery. In a recent qualitative study in CABG patients the most commonly cited barriers were 'other time commitment', 'inclement weather', and 'pain/injury/illness related or unrelated to the surgery' [39]. These most salient barriers, but also almost all other indicated barriers are present in the current study as well. The priority of the barriers, however, seems to be different for CABG patients and recipients of SOT. Physical limitations (pain/injury/illness related or unrelated to the surgery) are the number one barrier in recipients of SOT where it has a lower priority in CABG patients, as is also the case for energy level being a barrier. Where the weather is a highly salient barrier in CABG patients the priority was clearly lower in recipients of SOT. The most commonly mentioned facilitators in CABG patients were 'it feels good to exercise', and 'improving physical health' [39]. These most salient facilitators, but also the other indicated facilitators in the study are very similar to the indicated facilitators in the current study. The priority of facilitators also seems to concur. Furthermore, the items classified in the personal components *physical* and

*psychological* and in the *social* and *physical environment* corresponding to those experienced in the general population also show many similarities with the barriers and facilitators in patients with end-stage organ disease [21–28]. It therefore seems likely that the majority of these barriers and facilitators are already present in the pre-transplant phase. Whether the number and/or severity of barriers and facilitators change from the pre-transplant phase to the post-transplant phase has not been reported so far.

Besides the barriers and facilitators similar to those experienced in the general population, CABG patients, and in the end-stage organ disease phase, there are several factors specific to SOT recipients. Perhaps the most striking is that several participants described to be inactive or moderately active before they became ill and during the period before transplantation, however, are now more active due to a feeling of responsibility to take good care of the received organ. Where earlier research demonstrated that previous exercise participation in adulthood is associated with current exercise participation [35,36,40], it seems that this association may not apply to all SOT recipients. Also associated with the transplanted organ but functioning as a barrier is a fear of damaging the new organ and insecurity with body signals. Therefore, it seems important that information and practical guidance are offered to recipients experiencing this barrier. The negative side-effects of immunosuppressants on muscle mass, muscle fiber type proportion and osteoporosis can lead to physical limitations and thereby function as a barrier to PA [17–19,41–43]. Related to the decreased muscle mass and the fiber type switch in combination with the usually prolonged period of reduced activity prior to and during hospitalization for transplantation, recipients often experience a lack of strength. This lack of strength could be a barrier and a facilitator, however, this needs specific attention in this population. A final distinct aspect mentioned is the expertise of personnel. It is indicated that (allied) health care providers should have sufficient knowledge about this particular population. Exercise specialists (e.g. expert physical therapists or clinical kinesiologists) could be deployed to reduce several barriers and utilize facilitators. With an adequate program and guidance, a reduction could likely be achieved in physical limitations, fear, side effects of medication, and weight as well as an increase in strength, energy level, reinforcement, and self-efficacy.

Results of the current study partly confirm the finding of the quantitative study on barriers to and facilitators of PA in kidney transplant recipients [29]. The major barriers in that study were ‘lack of motivation’, ‘preferring to spend time otherwise’, ‘weather’, ‘fatigue’, and ‘health conditions’. Major facilitators were health benefits and social support systems. The current study adds depth to these factors by providing more context and looking at why these barriers and facilitators are experienced. Furthermore, additional transplant specific barriers and facilitators are identified.

When taking all of the indicated barriers and facilitators into account, it seems that guidance for SOT recipients could best be initiated in an expert center or by specialized therapists. Depending on the amount and types of barriers, an interdisciplinary team or specialized exercise therapist could be deployed to initiate PA following transplantation. When sufficient knowledge and experience with training is gained, recipients are likely able to continue in their own environment. The most appropriate timing for this program might differ per person, type of transplantation, and rate of recovery after transplantation. As there were no clear differences between the transplant recipients’ groups, there appears to be no substantiation for treating these groups differently considering barriers to and facilitators of PA.

To our knowledge, this is the first study to investigate barriers to and facilitators of PA in a qualitative manner and between all SOT groups. Therefore, it provides new insight into the reasons and motives of PA behavior in this population and demonstrates that the various groups experience largely equal barriers and facilitators. A limitation of the study is that the current level of PA was not explicitly quantified [44,45] and that therefore no sub-analyses

could be made on active versus non-active participants. The sample size was small as is common in qualitative research. Although, one could argue that sixteen participants, subdivided into four groups is rather limited. However, we checked for newly emerging themes to determine data saturation and the final four interviews did not yield any new themes. This appears to support the assumption that the concepts derived can be transferred to a wider population of SOT recipients. Nonetheless, some caution should be taken into account and further, quantitative, research should be undertaken to confirm these findings and to study the relevance of individual constructs per organ transplantation group on PA behavior.

## Conclusion

The identified barriers and facilitators are partly comparable to the general population and partly specific for SOT recipients. The overview of barriers and facilitators generated in this study indicates several personal and environmental factors that can be considered in intervention development. Further research should be undertaken to investigate if focusing on the proposed barriers and facilitators will result in increased physical activity behavior and reduced sedentary time in SOT recipients.

## Supporting Information

### S1 Appendix. Interview guide.

(DOCX)

### S1 Table. Distribution of mentioned barriers and facilitators across transplant recipient groups. Tx, transplantation.

(DOCX)

## Acknowledgments

We would like to thank all participants for their collaboration. For help with patient selection we would like to thank Mrs. Hendyke Gerds, Mrs. Gerda Drent, and Mrs. Dorien Zelle. For expert review we greatly thank Mrs. Sanne van den Berg.

## Author Contributions

**Conceptualization:** EA RD PD CS.

**Data curation:** EA.

**Formal analysis:** EA SZ RD PD.

**Investigation:** EA.

**Methodology:** EA RD PD CS.

**Project administration:** EA.

**Resources:** EV.

**Supervision:** RD PD CS.

**Visualization:** EA.

**Writing – original draft:** EA SZ.

**Writing – review & editing:** EA SZ RD EV PD CS.

## References

1. Annual Report/ Eurotransplant International Foundation. Leiden: Eurotransplant Foundation.- III., graf, tab; 2014.
2. Mathur S, Janaudis-Ferreira T, Wickerson L, Singer LG, Patcai J, Rozenberg D, et al. Meeting report: consensus recommendations for a research agenda in exercise in solid organ transplantation. *Am J Transplant*. 2014; 14: 2235–2245. doi: [10.1111/ajt.12874](https://doi.org/10.1111/ajt.12874) PMID: [25135579](https://pubmed.ncbi.nlm.nih.gov/25135579/)
3. Slapak M. Sport for the transplant athlete-just harmless fun or a valuable tool. *Ann Transplant*. 2005; 10: 24–27. PMID: [17037084](https://pubmed.ncbi.nlm.nih.gov/17037084/)
4. Pirenne J, Van Gelder F, Kharkevitch T, Nevens F, Verslype C, Peetermans WE, et al. Tolerance of liver transplant patients to strenuous physical activity in high-altitude. *Am J Transplant*. 2004; 4: 554–560. PMID: [15023147](https://pubmed.ncbi.nlm.nih.gov/15023147/)
5. van Adrichem EJ, Siebelink MJ, Rottier BL, Dilling JM, Kuiken G, van der Schans CP, et al. Tolerance of Organ Transplant Recipients to Physical Activity during a High-Altitude Expedition: Climbing Mount Kilimanjaro. *PLoS One*. 2015; 10: e0142641. doi: [10.1371/journal.pone.0142641](https://doi.org/10.1371/journal.pone.0142641) PMID: [26606048](https://pubmed.ncbi.nlm.nih.gov/26606048/)
6. Myers J, Gullestad L, Bellin D, Ross H, Vagelos R, Fowler M. Physical activity patterns and exercise performance in cardiac transplant recipients. *Journal of Cardiopulmonary Rehabilitation and Prevention*. 2003; 23: 100–106.
7. Evangelista LS, Dracup K, Doering L, Moser DK, Kobashigawa J. Physical activity patterns in heart transplant women. *Journal of Cardiovascular Nursing*. 2005; 20: 334–339. PMID: [16141778](https://pubmed.ncbi.nlm.nih.gov/16141778/)
8. Langer D, Gosselink R, Pitta F, Burtin C, Verleden G, Dupont L, et al. Physical activity in daily life 1 year after lung transplantation. *The Journal of Heart and Lung Transplantation*. 2009; 28: 572–578. doi: [10.1016/j.healun.2009.03.007](https://doi.org/10.1016/j.healun.2009.03.007) PMID: [19481017](https://pubmed.ncbi.nlm.nih.gov/19481017/)
9. van Adrichem EJ, Reinsma GD, van den Berg S, van der Bij W, Erasmus ME, Krijnen WP, et al. Predicting 6-minute walking distance in recipients of lung transplantation: longitudinal study of 108 patients. *Phys Ther*. 2015; 95: 720–729. doi: [10.2522/ptj.20140001](https://doi.org/10.2522/ptj.20140001) PMID: [25524871](https://pubmed.ncbi.nlm.nih.gov/25524871/)
10. Masala D, Mannocci A, Unim B, Del Cimmuto A, Turchetta F, Gatto G, et al. Quality of life and physical activity in liver transplantation patients: results of a case-control study in Italy. *Transplant Proc*. 2012; 44: 1346–1350. doi: [10.1016/j.transproceed.2012.01.123](https://doi.org/10.1016/j.transproceed.2012.01.123) PMID: [22664013](https://pubmed.ncbi.nlm.nih.gov/22664013/)
11. van den Ham EC, Kooman JP, Schols AM, Nieman FH, Does JD, Franssen FM, et al. Similarities in skeletal muscle strength and exercise capacity between renal transplant and hemodialysis patients. *Am J Transplant*. 2005; 5: 1957–1965. PMID: [15996245](https://pubmed.ncbi.nlm.nih.gov/15996245/)
12. Zelle DM, Corpeleijn E, Stolk RP, de Greef MH, Gans RO, van der Heide JJ, et al. Low physical activity and risk of cardiovascular and all-cause mortality in renal transplant recipients. *Clin J Am Soc Nephrol*. 2011; 6: 898–905. doi: [10.2215/CJN.03340410](https://doi.org/10.2215/CJN.03340410) PMID: [21372213](https://pubmed.ncbi.nlm.nih.gov/21372213/)
13. Nielens H, Lejeune TM, Lalaoui A, Squifflet JP, Pirson Y, Goffin E. Increase of physical activity level after successful renal transplantation: a 5 year follow-up study. *Nephrology Dialysis Transplantation*. 2001; 16: 134–140.
14. Dontje ML, de Greef MH, Krijnen WP, Corpeleijn E, Kok T, Bakker SJ, et al. Longitudinal measurement of physical activity following kidney transplantation. *Clin Transplant*. 2014; 28: 394–402. doi: [10.1111/ctr.12325](https://doi.org/10.1111/ctr.12325) PMID: [24635476](https://pubmed.ncbi.nlm.nih.gov/24635476/)
15. Didsbury M, McGee RG, Tong A, Craig JC, Chapman JR, Chadban S, et al. Exercise training in solid organ transplant recipients: a systematic review and meta-analysis. *Transplantation*. 2013; 95: 679–687. doi: [10.1097/TP.0b013e31827a3d3e](https://doi.org/10.1097/TP.0b013e31827a3d3e) PMID: [23364480](https://pubmed.ncbi.nlm.nih.gov/23364480/)
16. Langer D, Burtin C, Schepers L, Ivanova A, Verleden G, Decramer M, et al. Exercise training after lung transplantation improves participation in daily activity: a randomized controlled trial. *American Journal of Transplantation*. 2012
17. Williams TJ, McKenna MJ. Exercise limitation following transplantation. *Compr Physiol*. 2012; 2: 1937–1979. doi: [10.1002/cphy.c110021](https://doi.org/10.1002/cphy.c110021) PMID: [23723030](https://pubmed.ncbi.nlm.nih.gov/23723030/)
18. Hudson MB, Price SR. Calcineurin: a poorly understood regulator of muscle mass. *Int J Biochem Cell Biol*. 2013; 45: 2173–2178. doi: [10.1016/j.biocel.2013.06.029](https://doi.org/10.1016/j.biocel.2013.06.029) PMID: [23838168](https://pubmed.ncbi.nlm.nih.gov/23838168/)
19. Mitsui T, Azuma H, Nagasawa M, Iuchi T, Akaike M, Odomi M, et al. Chronic corticosteroid administration causes mitochondrial dysfunction in skeletal muscle. *J Neurol*. 2002; 249: 1004–1009. PMID: [12195445](https://pubmed.ncbi.nlm.nih.gov/12195445/)
20. Pender NJ, Murdaugh CL, Parsons MA. The health promotion model. *Health promotion in nursing practice*. 2002; 4: 59–79.
21. Bossola M, Pellu V, Di Stasio E, Tazza L, Giungi S, Nebiolo PE. Self-reported physical activity in patients on chronic hemodialysis: correlates and barriers. *Blood purification*. 2014; 38: 24–29. doi: [10.1159/000363599](https://doi.org/10.1159/000363599) PMID: [25247245](https://pubmed.ncbi.nlm.nih.gov/25247245/)

22. Clarke AL, Young HML, Hull KL, Hudson N, Burton JO, Smith AC. Motivations and barriers to exercise in chronic kidney disease: a qualitative study. *Nephrology Dialysis Transplantation*. 2015; 30: 1885–1892.
23. Delgado C, Johansen KL. Barriers to exercise participation among dialysis patients. *Nephrology Dialysis Transplantation*. 2012; 27: 1152–1157.
24. Goodman ED, Ballou MB. Perceived barriers and motivators to exercise in hemodialysis patients. *Nephrol Nurs J*. 2004; 31: 23–29. PMID: [15008071](#)
25. Frith J, Day CP, Robinson L, Elliott C, Jones DEJ, Newton JL. Potential strategies to improve uptake of exercise interventions in non-alcoholic fatty liver disease. *Journal of hepatology*. 2010; 52: 112–116. doi: [10.1016/j.jhep.2009.10.010](#) PMID: [19897272](#)
26. Thorpe O, Johnston K, Kumar S. Barriers and enablers to physical activity participation in patients with COPD: a systematic review. *Journal of cardiopulmonary rehabilitation and prevention*. 2012; 32: 359–369. doi: [10.1097/HCR.0b013e318262d7df](#) PMID: [22941449](#)
27. Tierney S, Elwers H, Sange C, Mamas M, Rutter MK, Gibson M, et al. What influences physical activity in people with heart failure? A qualitative study. *International journal of nursing studies*. 2011; 48: 1234–1243. doi: [10.1016/j.ijnurstu.2011.03.003](#) PMID: [21459380](#)
28. Yates BC, Price-Fowlkes T, Agrawal S. Barriers and facilitators of self-reported physical activity in cardiac patients. *Research in nursing & health*. 2003; 26: 459–469.
29. Sánchez ZV, Cashion AK, Cowan PA, Jacob SR, Wicks MN, Velasquez-Mieyer P. Perceived barriers and facilitators to physical activity in kidney transplant recipients. *Progress in Transplantation*. 2007; 17: 324–331. PMID: [18240699](#)
30. Ritchie J, Lewis J, Nicholls CM, Ormston R. *Qualitative research practice: A guide for social science students and researchers*. Sage; 2013.
31. Caspersen CJ, Powell KE, Christenson GM. Physical activity, exercise, and physical fitness: definitions and distinctions for health-related research. *Public Health Rep*. 1985; 100: 126–131. PMID: [3920711](#)
32. Braun V, Clarke V. Using thematic analysis in psychology. *Qualitative Research in Psychology*. 2006; 3: 77–101.
33. Pope C, Ziebland S, Mays N. Analysing qualitative data. In: Pope C, Mays N, editors. *Qualitative research in health care*. Oxford: BMJ Books, Blackwell Publishing Ltd; 2006. pp. 63–81.
34. van der Ploeg HP, van der Beek AJ, van der Woude LH, van Mechelen W. Physical activity for people with a disability: a conceptual model. *Sports Med*. 2004; 34: 639–649. PMID: [15335241](#)
35. Sherwood NE, Jeffery RW. The behavioral determinants of exercise: implications for physical activity interventions. *Annu Rev Nutr*. 2000; 20: 21–44. PMID: [10940325](#)
36. Trost SG, Owen N, Bauman AE, Sallis JF, Brown W. Correlates of adults' participation in physical activity: review and update. *Med Sci Sports Exerc*. 2002; 34: 1996–2001. PMID: [12471307](#)
37. Schutzer KA, Graves BS. Barriers and motivations to exercise in older adults. *Prev Med*. 2004; 39: 1056–1061. PMID: [15475041](#)
38. Koeneman MA, Verheijden MW, Chinapaw MJ, Hopman-Rock M. Determinants of physical activity and exercise in healthy older adults: a systematic review. *Int J Behav Nutr Phys Act*. 2011; 8: 142. doi: [10.1186/1479-5868-8-142](#) PMID: [22204444](#)
39. Cleary K, LaPier T, Rippee A. Perceptions of exercise and quality of life in older patients in the United States during the first year following coronary artery bypass surgery. *Physiother Theory Pract*. 2015; 31: 337–346. doi: [10.3109/09593985.2015.1004770](#) PMID: [25630389](#)
40. Oman RF, King AC. Predicting the adoption and maintenance of exercise participation using self-efficacy and previous exercise participation rates. *Am J Health Promot*. 1998; 12: 154–161. PMID: [10176088](#)
41. Wang XN, Williams TJ, McKenna MJ, Li JL, Fraser SF, Side EA, et al. Skeletal muscle oxidative capacity, fiber type, and metabolites after lung transplantation. *Am J Respir Crit Care Med*. 1999; 160: 57–63. PMID: [10390380](#)
42. Morton JM, McKenna MJ, Carey MF, Fraser SF, Parkin JA, Snell G, et al. Reductions in type 1 fibre proportions and oxidative enzyme activity in skeletal muscle exist pre & post lung transplantation. *The Journal of Heart and Lung Transplantation*. 1999; 18: 52.
43. Kulak CA, Borba VZ, Kulak J, Custódio MR. Osteoporosis after transplantation. *Curr Osteoporos Rep*. 2012; 10: 48–55. doi: [10.1007/s11914-011-0083-y](#) PMID: [22167576](#)
44. Godin G, Shephard RJ. Use of attitude-behaviour models in exercise promotion. *Sports Medicine*. 1990; 10: 103–121. PMID: [2204097](#)
45. De Bourdeaudhuij I, Sallis J. Relative contribution of psychosocial variables to the explanation of physical activity in three population-based adult samples. *Preventive medicine*. 2002; 34: 279–288. PMID: [11817925](#)
